# Supplementary material for: Cardiac-specific overexpression of Ndufs1 ameliorates cardiac dysfunction after myocardial infarction by alleviating mitochondrial dysfunction and apoptosis
Source: Springer Nature journal article supplement (doi:10.1038/s12276-022-00800-5), 2022-07-11
Supplement: MOESM1 [file 12276_2022_800_MOESM1_ESM.pdf]

## **Supplemental Information**

### **Cardiac-specific overexpression of Ndufs1 ameliorates cardiac dysfunction after myocardial infarction by alleviating mitochondrial dysfunction and apoptosis**

Bingchao Qi,<sup>1,3</sup> Liqiang Song<sup>2,3</sup>, Lang Hu,<sup>1,3</sup> Dong Guo,<sup>1</sup> Gaotong Ren,<sup>1</sup> Tingwei Peng,<sup>1</sup> Mingchuan Liu,<sup>1</sup> Yexian Fang,<sup>1</sup> Chunyu Li,<sup>1</sup> Mingming Zhang,<sup>1</sup> and Yan Li.<sup>1</sup>

<sup>1</sup>Department of Cardiology, Tangdu Hospital, Fourth Military Medical University, Xi'an, 710038, People's Republic of China.

<sup>2</sup>Department of Pulmonary and Critical Care Medicine, Xijing Hospital, Fourth Military Medical University, Xi'an, 710032, People's Republic of China.

<sup>3</sup>These authors contributed equally.

#### **Address correspondence to:**

Prof. Yan Li, [profleeyan@163.com](mailto:profleeyan@163.com).

Prof. Mingming Zhang, [winterzhang3@163.com](mailto:winterzhang3@163.com).

Supplementary Figures

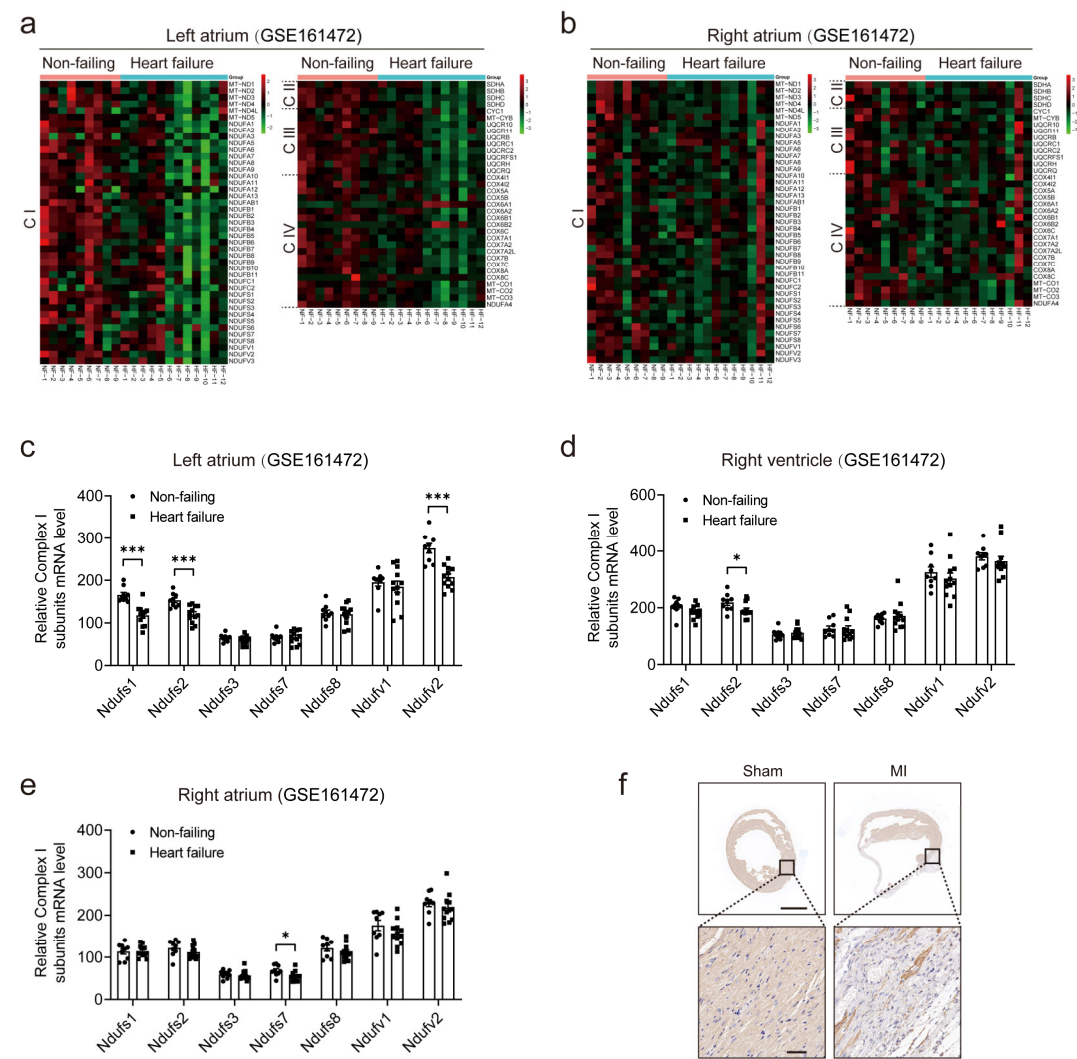

**Supplementary Fig. 1 Ndufs1 expression is decreased in the myocardium of heart failure patients and post-MI mice**

**a, b** Heat map of RNA-seq analysis for mitochondrial genes belonging to complex I (C I), complex II (C II), complex III (C III), and complex IV (C IV) in the left atrium samples and right atrium samples of non-failing subjects ( $n = 9$ ) and heart failure patients ( $n = 12$ ). **c-e** Mitochondrial Complex I subunits mRNA levels in three heart chambers of non-failing subjects ( $n = 9$ ) and heart failure patients ( $n = 12$ ) based on the RNA-seq data. **f** Representative immunohistochemical staining images of Ndufs1 in the

hearts of sham mice and mice on the 28th-day post-MI; upper scale bar = 2 mm, lower scale bar = 50  $\mu$ m. Data were presented as means  $\pm$  SEM. Statistical significance was assessed by one-way ANOVA.  $*p < 0.05$ ,  $**p < 0.01$ ,  $***p < 0.001$ .

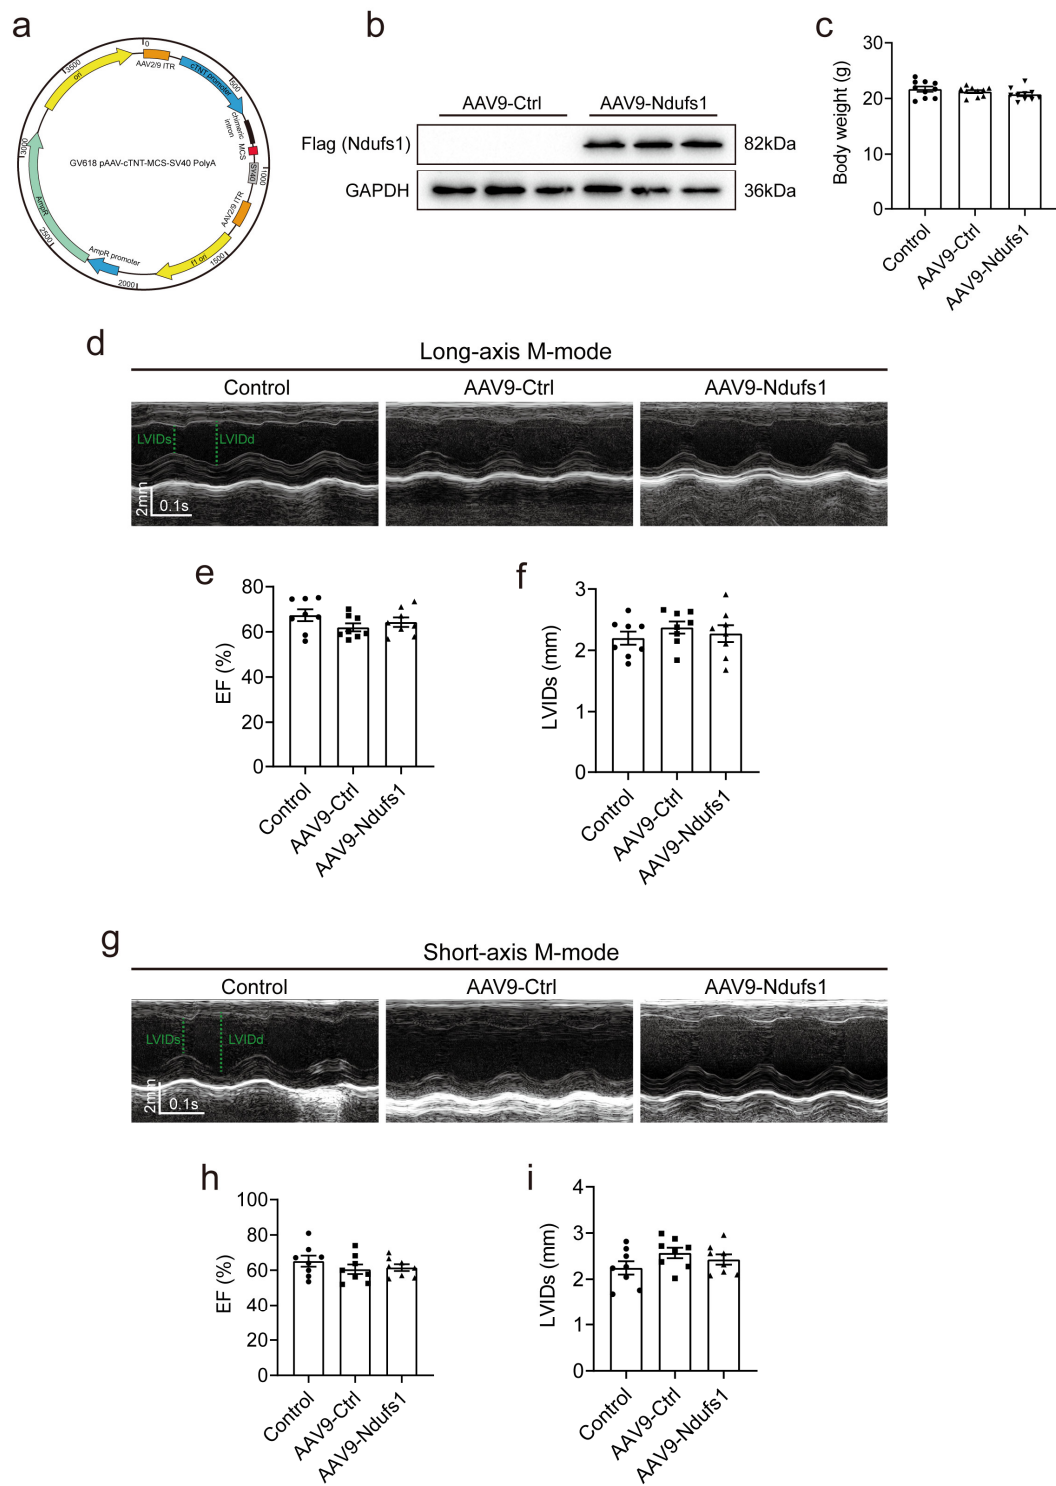

**Supplementary Fig. 2 Cardiac-specific overexpression of Ndufs1 has no effect on cardiac function in C57BL/6J mice**

**a** Schematic diagram of the adeno-associated virus serotype 9 (AAV9) vector under the control of a cardiac troponin T promoter (cTnT) used in this study. **b** Representative blots showing overexpression effect by AAV9-Ndufs1 infection in hearts of C57BL/6 J mice. **c** Body weight of mice at 4 weeks after AAV injection ( $n = 10$  per group). **d** Representative long-axis M-mode echocardiograph images at 4 weeks after AAV injection. LVIDs, left ventricular systolic internal dimension; LVIDd, left ventricular diastolic internal dimension. **e, f** Echocardiograph analysis in the long-axis M-mode ( $n = 8$  per group). EF, ejection fraction. **g** Representative short-axis M-mode echocardiograph images at 4 weeks after AAV injection. **h, i** Echocardiograph analysis in the short-axis M-mode ( $n = 8$  per group). Data were presented as means  $\pm$  SEM. Statistical significance was assessed by one-way ANOVA.

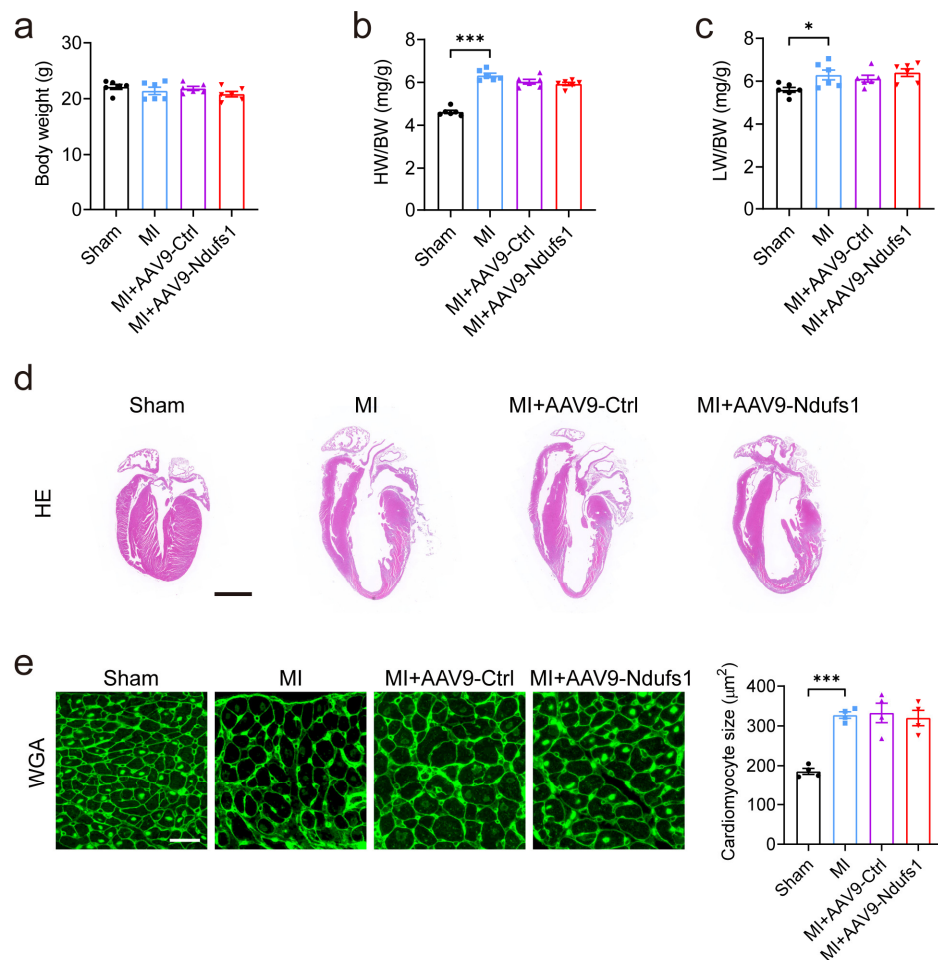

**Supplementary Fig. 3 Cardiac-specific overexpression of Ndufs1 has no effect on compensatory myocardial hypertrophy in the acute phase of MI**

**a-c** Body weight, heart weight/body weight (HW/BW), and lung weight/body weight (LW/BW) on the 3rd-day post-MI ( $n = 6$  per group). **d** Hematoxylin and eosin (HE) staining showed the gross morphology of hearts on the 3rd-day post-MI; scale bar = 2 mm. **e** Representative images of wheat germ agglutinin (WGA) staining and quantitative analysis of the cross-sectional area of cardiomyocytes on the 3rd day post-MI ( $n = 4$  per group); scale bar = 30 μm. Data were presented as means ± SEM. Statistical significance was assessed by one-way ANOVA.  $*p < 0.05$ ,  $***p < 0.001$ .

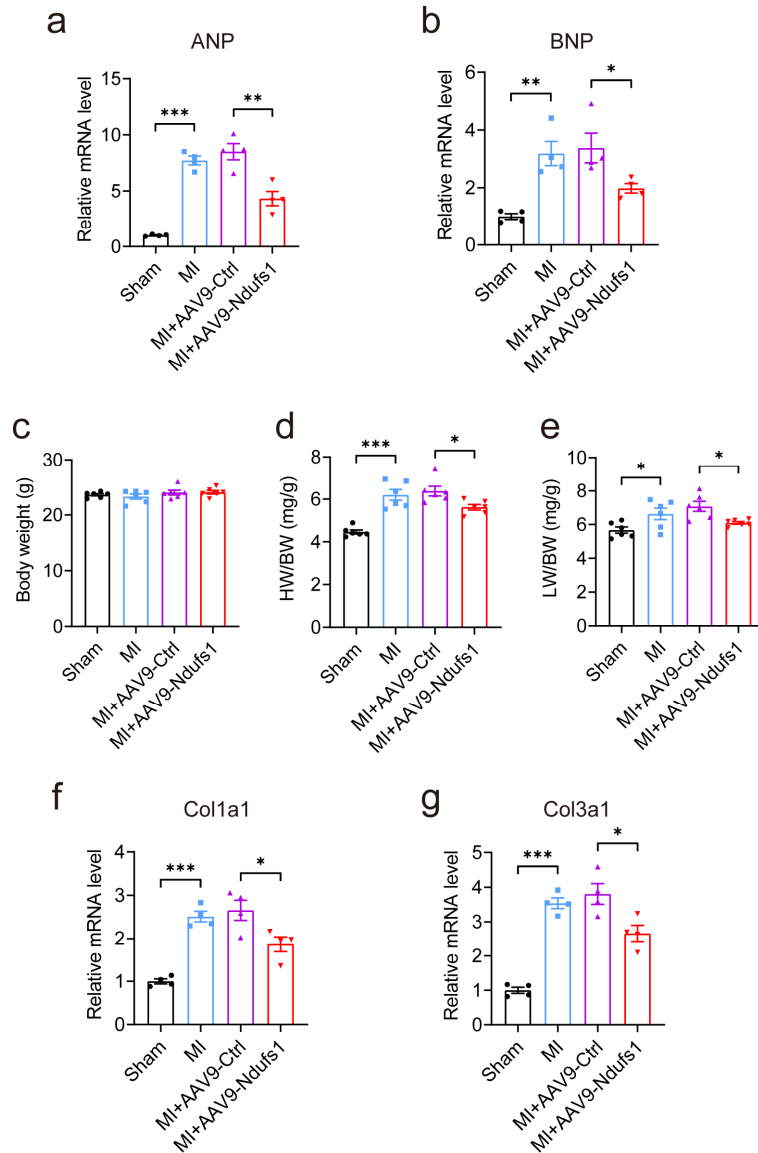

**Supplementary Fig. 4 Cardiac-specific overexpression of Ndufs1 significantly decreases the makers of heart failure and myocardial fibrosis in the healing phase of MI**

**a, b** qRT-PCR analysis of the makers of heart failure, including ANP and BNP, at 4 weeks after MI ( $n = 4$  per group). **c-e** Body weight, HW/BW, and LW/BW at 4 weeks after MI ( $n = 6$  per group). **f, g** qRT-PCR analysis of the makers of myocardial fibrosis, including Col1a1 and Col3a1, at 4 weeks after MI ( $n = 4$  per group). Data were presented as means  $\pm$  SEM. Statistical significance was assessed by one-way ANOVA.

\* $p < 0.05$ , \*\* $p < 0.01$ , \*\*\* $p < 0.001$ .

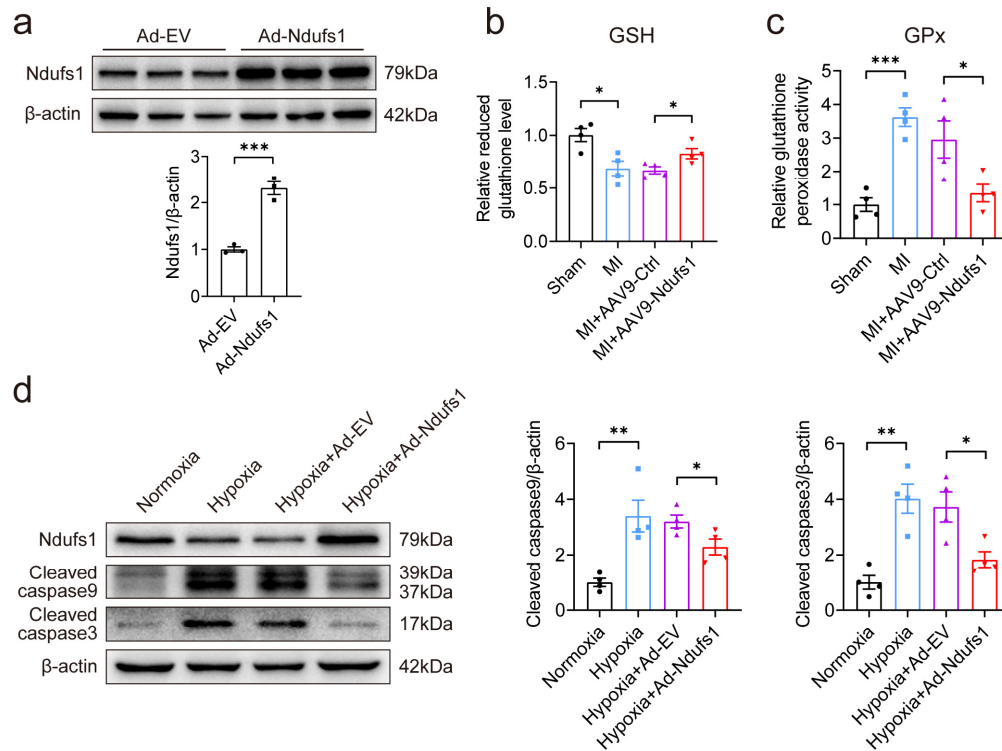

### Supplementary Fig. 5 Upregulation of Ndufs1 decreases MI-induced oxidative stress and hypoxia-induced apoptosis

**a** Representative blots and quantitative analysis of overexpression effect by Ad-Ndufs1 infection in NRCMs ( $n = 3$  per group). **b, c** GSH level and GPx activity in mouse heart tissues ( $n = 4$  per group). **d** Representative blots and quantitative analysis of cleaved caspase 9 and cleaved caspase 3 levels in NRCMs ( $n = 4$  per group). Data were presented as means  $\pm$  SEM. Statistical significance was assessed by one-way ANOVA.

\* $p < 0.05$ , \*\* $p < 0.01$ , \*\*\* $p < 0.001$ .

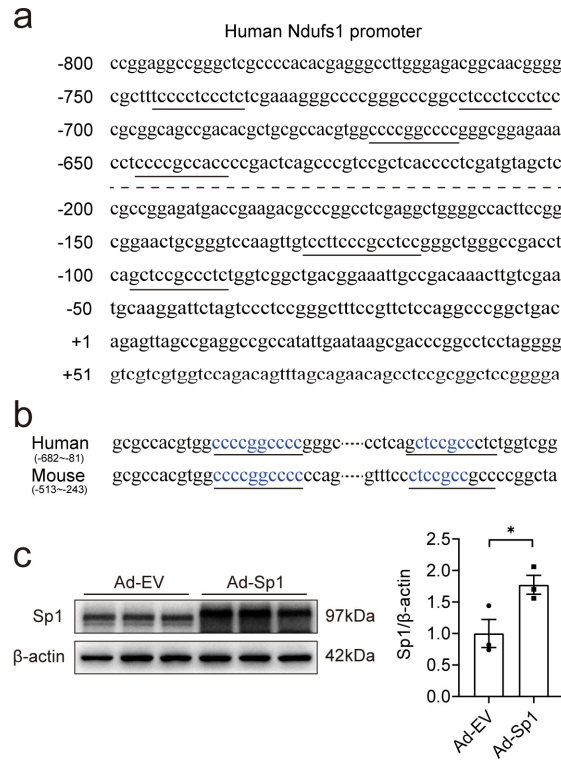

## Supplementary Fig. 6 Potential binding sites for the transcription factor Sp1

**a** Potential binding sites for Sp1 in the human Ndufs1 promoter region. **b** Conserved putative Sp1 binding sites of Ndufs1 promoter region in human and mouse. **c** Representative blots and quantitative analysis of overexpression effect by Ad-Sp1 infection in NRCMs ( $n = 3$  per group). Statistical significance was assessed by Student's t-test.  $*p < 0.05$ .



## Supplementary Tables

### Supplementary Table 1

The primer sequences used for quantitative PCR were as follows:

| Species | Gene                            | Forward primer (5'-3')  | Reverse primer (5'-3')    |
|---------|---------------------------------|-------------------------|---------------------------|
| Human   | <i>Ndufs1</i>                   | TTAGCAAATCACCCATTGGACTG | CCCCTCTAAAAATCGGCTCCTA    |
| Human   | <i><math>\beta</math>-actin</i> | CCTGGCACCCAGCACAAT      | GGGCCGGACTCGTCATAC        |
| Mouse   | <i>Ndufs1</i>                   | AGGATATGTTTCGCACAACTGG  | TCATGGTAACAGAATCGAGGGA    |
| Mouse   | <i>Ndufs2</i>                   | CAGCCAGATATTGAATGGGCA   | TGTTGGTCACCGCTTTTTCTT     |
| Mouse   | <i>Ndufs3</i>                   | TGGCAGCACGTAAGAAGGG     | CTTGGGTAAAGATTTAGCCACAT   |
| Mouse   | <i>Ndufs7</i>                   | GTTTCATCAGAGTGTAGCCACTG | CAGGCCGAAGGTCATAGGC       |
| Mouse   | <i>Ndufs8</i>                   | AGTGGCGGCAACGTACAAG     | TCGAAAGAGGTAACCTAGGGTCA   |
| Mouse   | <i>Ndufv1</i>                   | TTTCTCGGCGGGTTGGTTC     | GGTTGGTAAAGATCCGGTCTTC    |
| Mouse   | <i>Ndufv2</i>                   | GCAAGGAATTTGCATAAGACAGC | TAGCCATCCATTCTGCCTTTG     |
| Mouse   | <i>Col1a1</i>                   | GGAGACAGGTCAGACCTGTGTG  | CAGCTGGATAGCGACATCGGC     |
| Mouse   | <i>Col3a1</i>                   | CTGTAACATGGAACTGGGGAAA  | CTGTAACATGGAACTGGGGAAA    |
| Mouse   | <i>ANP</i>                      | GCTTCCAGGCCATATTGGAGCA  | TCTCTCAGAGGTGGGTGACCT     |
| Mouse   | <i>BNP</i>                      | ATGGATCTCCTGAAGGTGCTGT  | GCAGCTTGAGATATGTGTCACC    |
| Mouse   | <i>Sp1</i>                      | GCCGCCTTTTCTCAGACTC     | TTGGGTGACTCAATTCTGCTG     |
| Mouse   | <i>GAPDH</i>                    | GGCTGCCCAGAACATCAT      | CGGACACATTGGGGGTAG        |
| Rat     | <i>Ndufs1</i>                   | CCAAAGTAGCAGTGACACCTCC  | CAACATCATCATATCGAACCAG    |
| Rat     | <i>Col1a1</i>                   | ATCAGCCCCAAACCCCAAGGAGA | CGCAGGAAGGTCAGCTGGATAG    |
| Rat     | <i>Col3a1</i>                   | TGCCATTGCTGGAGTTGGA     | GAAGACATGATCTCCTCAGTGTTGA |
| Rat     | <i>ANP</i>                      | GGAGCCTGCGAAGGTCAA      | TATCTTCGGTACCGGAAGCTGT    |
| Rat     | <i>BNP</i>                      | CAGTCAGTCGCTTGGGCTGT    | GCAGAGTCAGAAGCCGGAGT      |
| Rat     | <i><math>\beta</math>-actin</i> | TGTCACCAACTGGGACGATA    | GGGGTGTTGAAGGTCTCAAA      |

### Supplementary Table 2

Primary antibodies used for western blotting and immunohistochemistry were as follows:

| Antibody               | Source | Company      | Catalogue Number |
|------------------------|--------|--------------|------------------|
| Ndufs1 (WB, IHC)       | Rabbit | Abcam        | ab169540         |
| GAPDH (WB)             | Rabbit | Proteintech  | 10494-1-AP       |
| $\beta$ -actin (WB)    | Rabbit | Proteintech  | 20536-1-AP       |
| Hif1 $\alpha$ (WB)     | Rabbit | Proteintech  | 20960-1-AP       |
| DDDDK tag (WB)         | Rabbit | Abcam        | ab205606         |
| Cleaved caspase-3 (WB) | Rabbit | CST          | 9664             |
| Cleaved caspase-9 (WB) | Rabbit | CST          | 20750            |
| Sp1 (ChIP)             | Rabbit | Active Motif | 39058            |
| Sp1 (WB)               | Rabbit | Proteintech  | 21962-1-AP       |

### Supplementary Table 3

siRNA sequences of primers were as follows:

| Target        | siRNA sense sequence (5'-3') | siRNA sense sequence (5'-3') |
|---------------|------------------------------|------------------------------|
| <i>Ndufs1</i> | GCAUGCAAUCCCUCGAUUTT         | AAUCGAGGGAUUUGCAUGCTT        |
| <i>Sp1</i>    | UGAGAACAGCAACUCCTT           | GGAGUUGUUGCUGUUCUCAUU        |
| Control       | UUCUCCGAACGUGUCACGUTT        | ACGUGACACGUUCGGAGAATT        |
